# Supplementary material for: Evaluating effects of recent changes in NHS resource allocation policy on inequalities in amenable mortality in England, 2007–2014: time-series analysis
Source: PubMed Central journal article supplement (PMC6352397; doi:10.1136/jech-2018-211141), 2018-11-23
Supplement: jech-2018-211141supp001.pdf [file jech-2018-211141supp001.pdf]

## Supplementary appendix 1: Causes of death considered to be amenable to healthcare

NHS Digital defines deaths considered amenable to healthcare if it is considered they could be averted if timely, appropriate and high-quality healthcare could prevent their occurrence.<sup>4,8</sup> Deaths may be specific to an age group and are classified by underlying cause of death using the ICD-10 classification, registered in the relevant calendar year and are aggregated to population level.

| Causes of death considered amenable to healthcare                      |                                        |                                                   |
|------------------------------------------------------------------------|----------------------------------------|---------------------------------------------------|
| Name of group                                                          | Age                                    | ICD-10 code                                       |
| Intestinal infections <sup>a</sup>                                     | 0-14                                   | A00-A09                                           |
| Tuberculosis                                                           | 0-74                                   | A15-A19, B90                                      |
| Other infections (Diphtheria, Tetanus, Poliomyelitis) <sup>a</sup>     | 0-74                                   | A36, A35, A80                                     |
| Whooping cough <sup>a</sup>                                            | 0-74                                   | A37                                               |
| Septicaemia <sup>a</sup>                                               | 0-74                                   | A40-A41                                           |
| Measles <sup>a</sup>                                                   | 1-14                                   | B05                                               |
| Selected invasive bacterial & protozoal infections) <sup>b</sup>       | 0-74                                   | A38-A41, A46, B50-B54, G00, G03, J02, L03         |
| Hepatitis C <sup>b</sup>                                               | 0-74                                   | B17.1, B18.2                                      |
| HIV/AIDS <sup>b</sup>                                                  | 0-74                                   | B20-B24                                           |
| Malignant neoplasm of colon and rectum                                 | 0-74                                   | C18-C21                                           |
| Malignant neoplasm of skin                                             | 0-74                                   | C44                                               |
| Malignant neoplasm of breast                                           | 0-74                                   | C50                                               |
| Malignant neoplasm of cervix uteri                                     | 0-74                                   | C53                                               |
| Malignant neoplasm of cervix uteri and body of the uterus <sup>a</sup> | 0-74                                   | C54, C55                                          |
| Malignant neoplasm of testis <sup>a</sup>                              | 0-74                                   | C62                                               |
| Hodgkin's disease                                                      | 0-74                                   | C81                                               |
| Leukaemia                                                              | 0-74                                   | C91-C95 <sup>a</sup><br>C91, C92.0 <sup>b</sup>   |
| Benign neoplasms <sup>b</sup>                                          | 0-74                                   | D10-D36                                           |
| Diseases of the thyroid <sup>a</sup>                                   | 0-74                                   | E00-E07                                           |
| Diabetes mellitus                                                      | 0-49                                   | E10-E14                                           |
| Epilepsy                                                               | 0-74                                   | G40-G41                                           |
| Rheumatic and other valvular heart disease                             | 0-74                                   | I05-I09 <sup>a</sup><br>I01-I09 <sup>b</sup>      |
| Hypertensive disease                                                   | 0-74                                   | I10-I13, I15 <sup>a</sup><br>I10-I15 <sup>b</sup> |
| Ischaemic heart disease                                                | 0-74                                   | I20-I25                                           |
| Cerebrovascular disease                                                | 0-74                                   | I60-I69                                           |
| All respiratory diseases (excl. pneumonia/influenza) <sup>a</sup>      | 1-14                                   | J00-J09, J20-J99                                  |
| Influenza                                                              | 0-74                                   | J10-J11 <sup>a</sup><br>J09-J11 <sup>b</sup>      |
| Pneumonia                                                              | 0-74                                   | J12-J18                                           |
| Asthma                                                                 | 0-44 <sup>a</sup><br>0-74 <sup>b</sup> | J45-J46                                           |
| Peptic and duodenal ulcers                                             | 0-74                                   | K25-K27 <sup>a</sup><br>K25-K28 <sup>b</sup>      |
| Appendicitis <sup>a</sup>                                              | 0-74                                   | K35-K38                                           |
| Abdominal hernia <sup>a</sup>                                          | 0-74                                   | K40-K46                                           |
| Cholelithiasis & cholecystitis <sup>a</sup>                            | 0-74                                   | K80-K81                                           |

|                                                                                                                 |      |                                                    |
|-----------------------------------------------------------------------------------------------------------------|------|----------------------------------------------------|
| Acute abdomen, appendicitis, intestinal obstruction, cholecystitis/lithiasis, pancreatitis, hernia <sup>b</sup> | 0-74 | K35-K38, K40-K46, K80-K83, K85, K86.1-K86.9, K91.5 |
| Nephritis and nephrosis                                                                                         | 0-74 | N00-N07, N17-N19, N25-N27                          |
| Benign prostatic hyperplasia <sup>a</sup>                                                                       | 0-74 | N40                                                |
| Obstructive uropathy & prostatic hyperplasia                                                                    | 0-74 | N13, N20-N21, N35, N40, N99.1                      |
| Maternal deaths <sup>a</sup>                                                                                    | All  | O00-O99                                            |
| Congenital cardiovascular anomalies <sup>a</sup>                                                                | 0-74 | Q20-Q28                                            |
| Perinatal deaths, all causes excluding stillbirths <sup>a</sup>                                                 | All  | A34 <sup>a</sup><br>P00-P96, A33                   |
| Congenital malformations, deformations & chromosomal abnormalities <sup>b</sup>                                 | 0-74 | Q00-Q99                                            |
| Misadventures to patients during surgical and medical care                                                      | All  | ^60-Y69, Y83-Y84                                   |

Source: HSCIC, 2015<sup>1</sup>

<sup>a</sup> classified up to 2010

<sup>b</sup> classified from 2011

## **Supplementary appendix 2: Method of generating annual figures for funding data for NHS spending in England between 2007-2014 for comparable areas**

Responsibility for health commissioning altered in 2012/13 in England, dividing responsibilities previously held by Primary Care Trusts (PCTs) to Clinical Commissioning Groups for secondary care, Local Area Teams (LATs) for primary care, local authorities for public health and NHS England for specialised services.

We extracted figures for budget allocations for PCTs from 2007-2013<sup>2</sup> and from 2013-2014 from CCGs for secondary care,<sup>3</sup> LATs for primary care,<sup>4</sup> local authorities for public health<sup>5</sup> and figures for specialised budget allocations mapped to CCG level.<sup>6</sup>

We then converted these funding figures to lower-tier local authority areas by developing a lookup between each geographical level using existing published lookups from the Office for National Statistics<sup>7,8,9,10,11</sup>, calculating figures at a Lower Layer Super Output Area level and aggregating these to local authorities using published population counts.

### Supplementary appendix 3: Regression Model Formula

Model equation:

$$\text{Mortality}_{i,j} = \beta_1 \text{Allocation}_{i,j} + \beta_2 \text{GDHI}_{i,j} + \beta_3 \text{Unemployment}_{i,j} + \text{IMDQ}_j \times \text{Allocation}_{i,j} + \mu_j + t + \varepsilon_{i,j}$$

Where  $i$  is the year of analysis and  $j$  is the local authority. Allocation, GDHI and Unemployment are the NHS funding allocation, average gross disposable household income and unemployment rate in, local authority  $j$  and year  $i$ .  $t$  and  $\mu$  are the fixed-effects variables for time and local authorities while  $\varepsilon$  is the error term. A series of interaction terms have been introduced to explore the relationship with funding and mortality in each quintile of deprivation (IMDQ <sub>$i$</sub> ).

## Supplementary appendix 4: Regression Diagnostics

### 1. Confirming normality assumption

The assumption that our regression model's residuals were normally distributed was tested by plotting quantiles of residuals against quantiles of the normal distribution. The approximation to the fitted line suggests the residuals are approximately normally distributed.

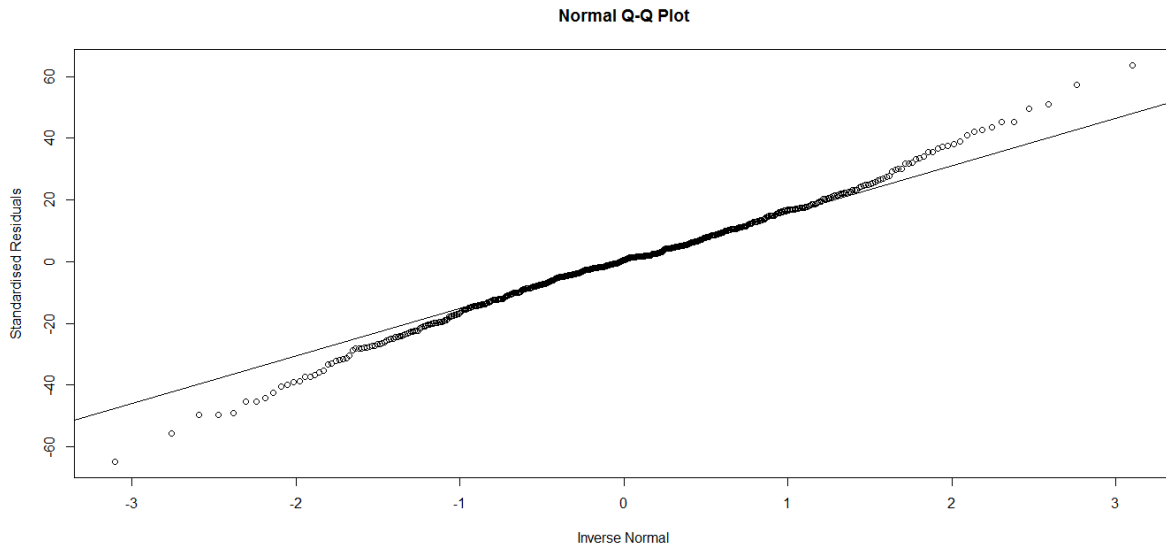

Figure 1 – Quantiles of model residuals against quantiles of the normal distribution

This is confirmed when we plot a histogram of our model residuals with the normal distribution fitted.

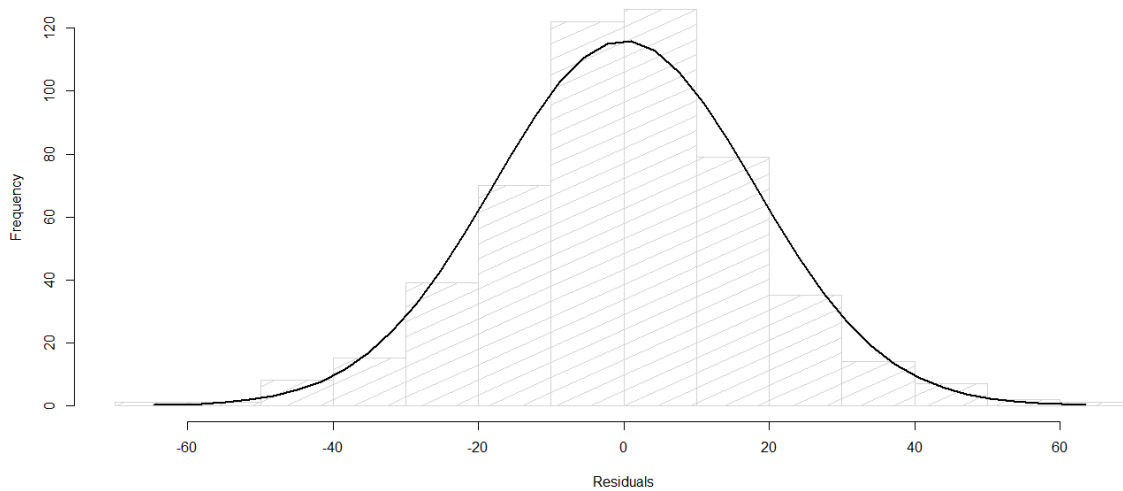

Figure 2 – Histogram of model residuals

### 2. Testing for presence of heteroscedasticity

Next, we tested whether the standard deviations of the error terms were correlated with the predictor variables in our model. The uniform spread of points in the y-direction on moving along

the x-axis suggests constant variance in the residuals, suggesting there is limited heteroscedasticity in our model.

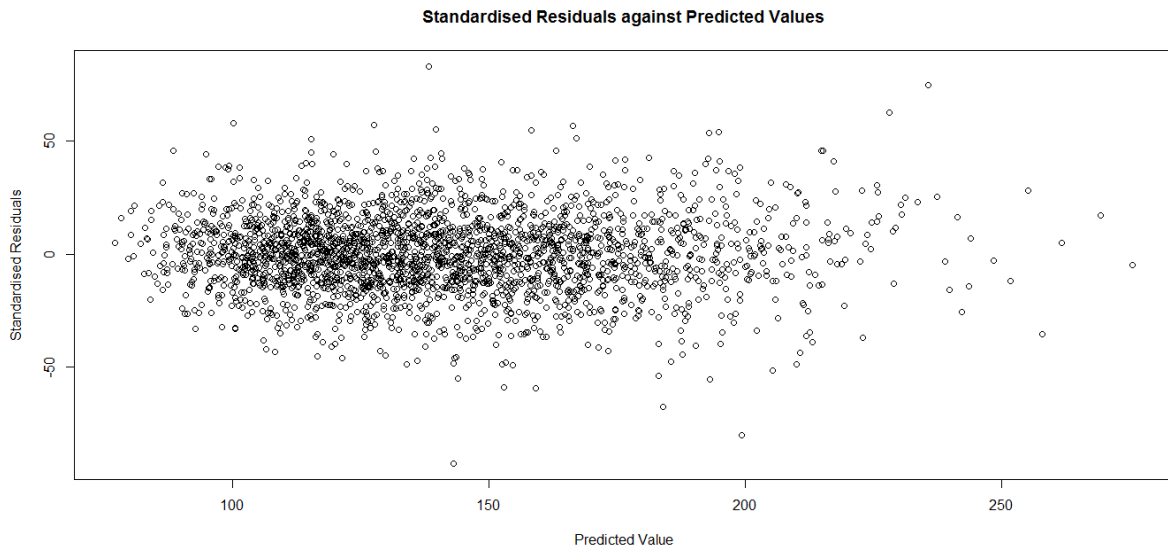

Figure 3 – Plot of model residuals against fitted values of predictor variables

### 3. Testing for presence of non-linearity between predictor and outcome variables

Lastly, a component plus residual plot was constructed to explore the presence of linearity between the main predictor variable, allocation, and the response variable, taking into account the presence of other independent variables. The regression line below confirms a linear relationship through the scatterplot, indicating that the assumption of a linear relationship to be reasonable.

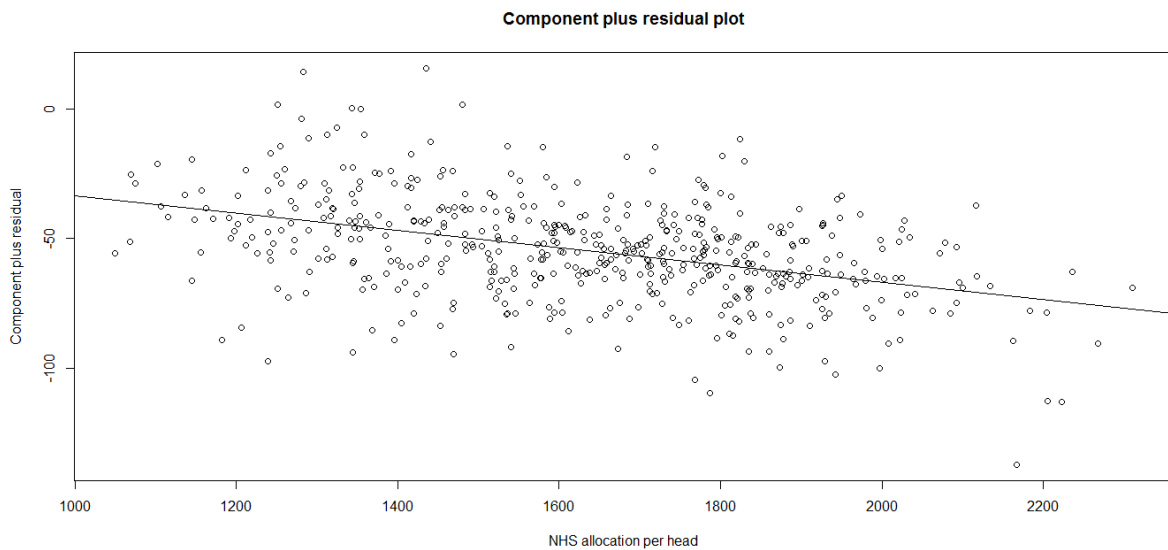

#### 4. Testing for multicollinearity using a pooled model

| Variable        | Generalised Variance Inflation Factor (GVIF) | Degrees freedom | GVIF <sup>1/(2 x DF)</sup> |
|-----------------|----------------------------------------------|-----------------|----------------------------|
| Allocation      | 8.83                                         | 1               | 2.97                       |
| GDHI            | 1.33                                         | 1               | 1.15                       |
| Unemp           | 2.31                                         | 1               | 1.52                       |
| IMDQ            | 4.63                                         | 4               | 1.21                       |
| Allocation*IMDQ | 12.63                                        | 4               | 1.31                       |

Variance inflation factors of over 5 generally represent potential for multicollinearity, while figures exceeding 10 are signs of significant multicollinearity. The GVIF for the interaction variable between allocation and IMDQ exceeds 10 and therefore highlights the likely presence of significant multicollinearity in the pooled model.

## Supplementary appendix 5: Alternative model output

### Allocation and PYLL

|       | <i>Male</i> | <i>LCI</i> | <i>UCI</i> | <i>Female</i> | <i>LCI</i> | <i>UCI</i> |
|-------|-------------|------------|------------|---------------|------------|------------|
| IMDQ1 | 0.116       | -0.542     | 0.775      | 0.024         | -0.565     | 0.612      |
| IMDQ2 | -0.036      | -0.669     | 0.598      | -0.041        | -0.607     | 0.525      |
| IMDQ3 | -0.019      | -0.618     | 0.579      | -0.091        | -0.644     | 0.463      |
| IMDQ4 | -0.296      | -0.919     | 0.327      | -0.013        | -0.563     | 0.537      |
| IMDQ5 | -0.644      | -1.214     | -0.074     | -0.337        | -0.832     | 0.158      |

### Allocation and AM excluding IHD

|       | <i>Male</i> | <i>LCI</i> | <i>UCI</i> | <i>Female</i> | <i>LCI</i> | <i>UCI</i> |
|-------|-------------|------------|------------|---------------|------------|------------|
| IMDQ1 | 0.017       | -0.002     | 0.036      | 0.001         | -0.017     | 0.019      |
| IMDQ2 | -0.002      | -0.020     | 0.017      | -0.001        | -0.017     | 0.016      |
| IMDQ3 | 0.011       | -0.007     | 0.029      | -0.020        | -0.017     | 0.013      |
| IMDQ4 | 0.005       | -0.012     | 0.022      | -0.003        | -0.018     | 0.013      |
| IMDQ5 | -0.001      | -0.017     | 0.017      | -0.005        | -0.018     | 0.009      |

### Allocation and non-AM

|       | <i>Male</i> | <i>LCI</i> | <i>UCI</i> | <i>Female</i> | <i>LCI</i> | <i>UCI</i> |
|-------|-------------|------------|------------|---------------|------------|------------|
| IMDQ1 | -0.008      | -0.047     | 0.031      | 0.017         | -0.013     | 0.046      |
| IMDQ2 | -0.009      | -0.044     | 0.025      | 0.015         | -0.014     | 0.044      |
| IMDQ3 | -0.020      | -0.055     | 0.014      | 0.018         | -0.009     | 0.046      |
| IMDQ4 | -0.022      | -0.057     | 0.013      | 0.020         | -0.006     | 0.046      |
| IMDQ5 | -0.048      | -0.079     | -0.017     | 0.005         | -0.020     | 0.030      |



## Supplementary appendix 6: Trends in mortality due to causes not amenable to healthcare for men and women between 2007 and 2014

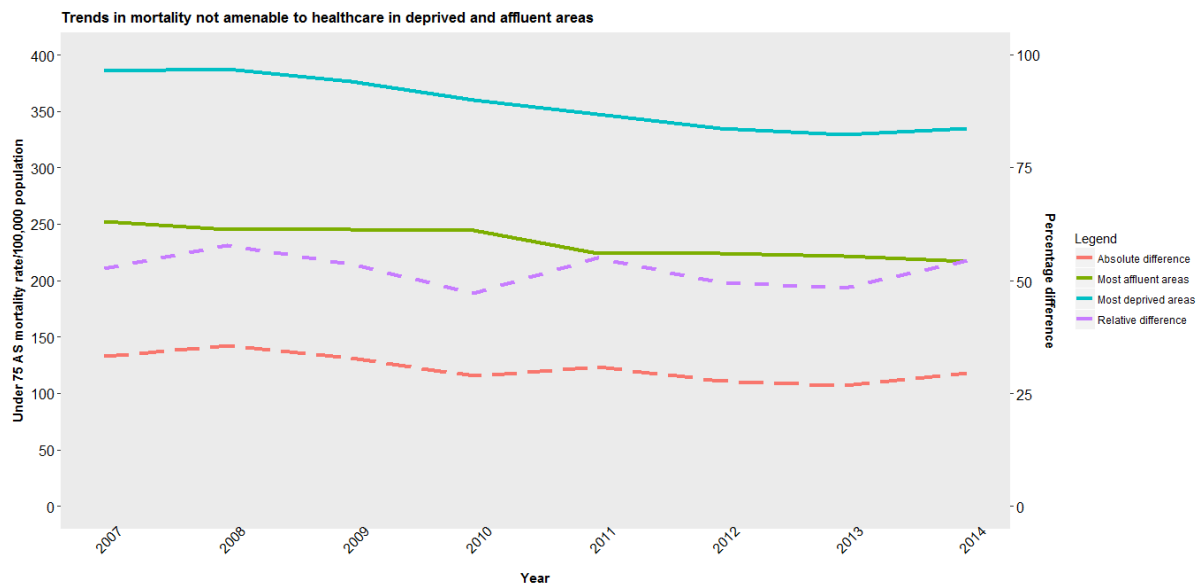

Figure 1 - Trend in population-weighted average mortality not amenable to healthcare for men in deprived and affluent areas and inequalities between areas in England, 2007 to 2014. AS=age standardised.

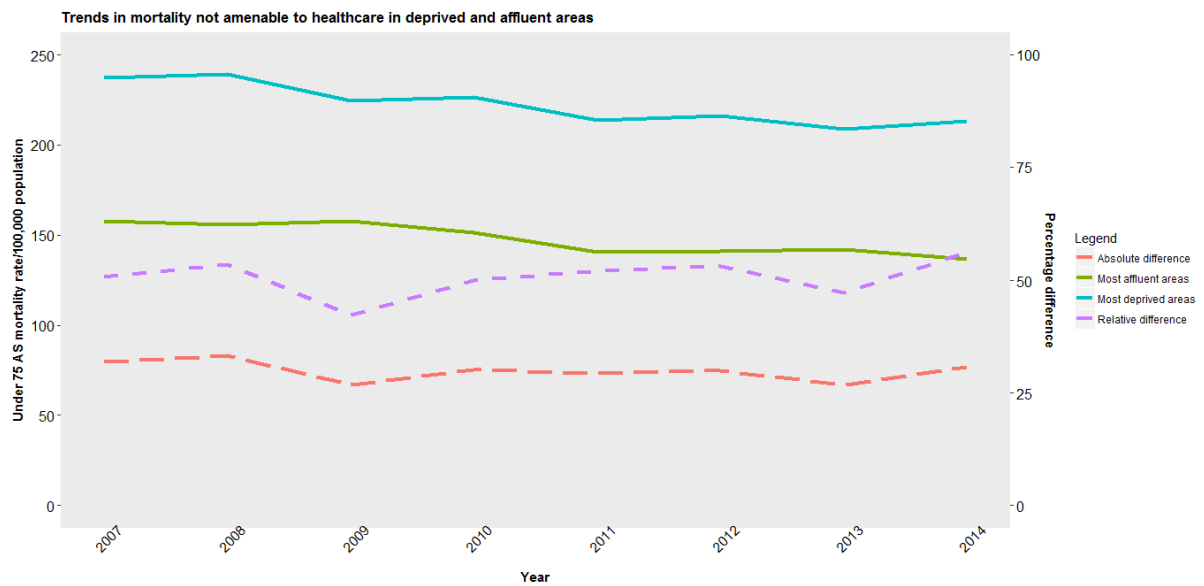

Figure 2 - Trend in population-weighted average mortality not amenable to healthcare for women in deprived and affluent areas and inequalities between areas in England, 2007 to 2014. AS=age standardised.

## Supplementary appendix 7: Calculating the reduction in mortality amenable to healthcare in deprived areas from regression estimates

Our model estimates the mortality reduction per pound of additional per person NHS spending between 2007 and 2014. For intuitiveness the figures displayed in Table 1 detail mortality reductions associated with greater changes in spending to the level of an additional £500 per person at a local level. Our model estimated each additional £1 per person NHS funding was associated in our model in deprived areas with a reduction of 0.026 (95% confidence interval 0.003 to 0.050) male deaths per 100,000 population. There was no significant association in the most affluent areas. NHS funding in the most deprived areas increased by £499 per person; using our model estimates this would theoretically produce a reduction of 13 deaths:

$$= 499 * 0.026 = 13$$

$$\text{UCL} = 499 * 0.050 = 25$$

$$\text{LCL} = 499 * 0.003 = 1.5$$

---

<sup>1</sup> Health & Social Care Information Centre (HSCIC). Compendium of Population Health Indicators. Mortality from causes considered amenable to health care. Indicator specification document. December 2015. Available from: [https://indicators.hscic.gov.uk/download/NCHOD/Specification/Spec\\_03D\\_171DRT0074.pdf](https://indicators.hscic.gov.uk/download/NCHOD/Specification/Spec_03D_171DRT0074.pdf) [Accessed 3 July 2017].

<sup>2</sup> Department of Health. NHS Allocations. Exposition books. Available from: <http://webarchive.nationalarchives.gov.uk/http://www.dh.gov.uk/en/Managingyourorganisation/Financeandplanning/Allocations/index.htm> [Accessed 27 Feb 2018].

<sup>3</sup> NHS England. Allocations. Allocations for 2013/2014. Available from: <https://www.england.nhs.uk/allocations> [Accessed 27 Feb 2018].

<sup>4</sup> NHS England. Technical Guide to Clinical Commissioning Group and Area Team allocations 2014-15 and 2015-16. K – Primary Care. Available from: <https://www.england.nhs.uk/2014/03/allocations-tech-guide> [Accessed 27 February 2018].

<sup>5</sup> Department of Health and Social Care. Public health grants to local authorities from 2013 to 2016. Available from: <https://www.gov.uk/government/publications/ring-fenced-public-health-grants-to-local-authorities-2013-14-and-2014-15> [Accessed 27 Feb 2018].

<sup>6</sup> NHS England. Annex D: Specialised Services. Available from: <https://www.england.nhs.uk/publication/annex-d-specialised-services> [Accessed 27 February 2018].

<sup>7</sup> Output Area to Primary Care Organisation to Strategic Health Authority (December 2011) Lookup in England and Wales. Available from: <https://data.gov.uk/dataset/output-area-to-primary-care-organisation-to-strategic-health-authority-december-2011-lookup-in-4> [Accessed 27 February 2018].

<sup>8</sup> ONS. Lower Layer Super Output Area (2011) to Ward (2016) Lookup in England and Wales. Available from: <http://geoportal.statistics.gov.uk/datasets/lower-layer-super-output-area-2011-to-ward-2016-lookup-in-england-and-wales> [Accessed 27 February 2018].

<sup>9</sup> ONS. LSOA (2011) to Clinical Commissioning Groups to Sustainability and Transformation Partnerships (April 2017) Lookup in England. Available from: <http://geoportal.statistics.gov.uk/datasets/lsOA-2011-to-clinical-commissioning-groups-to-sustainability-and-transformation-partnerships-april-2017-lookup-in-england> [Accessed 27 February 2018].

<sup>10</sup> NHS Commissioning Board: Local area teams. Available from: <https://www.england.nhs.uk/2012/06/local-teams-senates> [Accessed 27 February 2018].

<sup>11</sup> ONS. Lower Tier Local Authority to Upper Tier Local Authority (December 2017) Lookup in England and Wales. Available from: <http://geoportal.statistics.gov.uk/datasets/lower-tier-local-authority-to-upper-tier-local-authority-december-2017-lookup-in-england-and-wales> [Accessed 27 February 2018].
